# Supplementary material for: What is known about the health effects of non-steroidal anti-inflammatory drug (NSAID) use in marathon and ultraendurance running: a scoping review
Source: HighWire-hosted journal article supplement (doi:10.1136/bmjsem-2023-001846), 2024-02-01
Supplement: bmjsem-2023-001846supp001_data_supplement.pdf [file bmjsem-2023-001846supp001_data_supplement.pdf]

**Supplementary file 1:** Full search strategy from Medline Ovid

1. ultramarathon\*.ti,ab.
2. ultra-marathon\*.ti,ab.
3. ultra-distance run\*.ti,ab.
4. Marathon Running/
5. ultradistance run\*.ti,ab.
6. ultra-endurance run\*.ti,ab.
7. ultraendurance run\*.ti,ab.
8. ultra run\*.ti,ab.
9. ultrarun\*.ti,ab.
10. endurance run\*.ti,ab.
11. ultra-endurance athlete\*.ti,ab.
12. ultraendurance athlete\*.ti,ab.
13. ultra-distance athlete\*.ti,ab.
14. ultradistance athlete\*.ti,ab.
15. marathon\*.ti,ab.
16. ironman\*.ti,ab.
17. 1 or 2 or 3 or 4 or 5 or 6 or 7 or 8 or 9 or 10 or 11 or 12 or 13 or 14 or 15 or 16
18. NSAID\*.ti,ab.
19. ibuprofen\*.ti,ab.
20. non-steroidal anti-inflammatory\*.ti,ab.
21. Anti-Inflammatory Agents, Non-Steroidal/
22. naproxen\*.ti,ab.
23. diclofenac\*.ti,ab.
24. advil\*.ti,ab.
25. analges\*.ti,ab.
26. 18 or 19 or 20 or 21 or 22 or 23 or 25
27. 17 and 26
